# Supplementary material for: Solar-Driven Syngas Production Using Al-Doped ZnTe Nanorod Photocathodes
Source: MDPI journal article supplement (doi:10.3390/ma15093102), 2022-04-25
Supplement: s1 [file s1]

Supplementary Materials

# Solar-Driven Syngas Production Using Al-Doped ZnTe Nanorod Photocathodes

Youn Jeong Jang \*, Chohee Lee, Yong Hyun Moon and Seokwoo Choe

Department of Chemical Engineering, Hanyang University, Seongdong-gu, Seoul 04763, Korea; chgm19612@hanyang.ac.kr (C.L.); myh4791@hanyang.ac.kr (Y.H.M.); choe5192@hanyang.ac.kr (S.C.)  
\* Correspondence: yjang53@hanyang.ac.kr; Tel.: +82-2-2220-0526

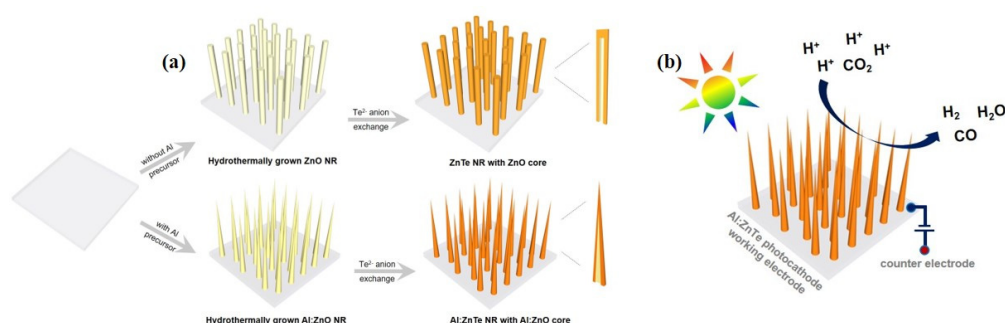

**Scheme S1.** Schematic diagram for (a) ZnTe NR and Al:ZnTe NR film synthesis and (b) photoelectrochemical syngas production set-up.

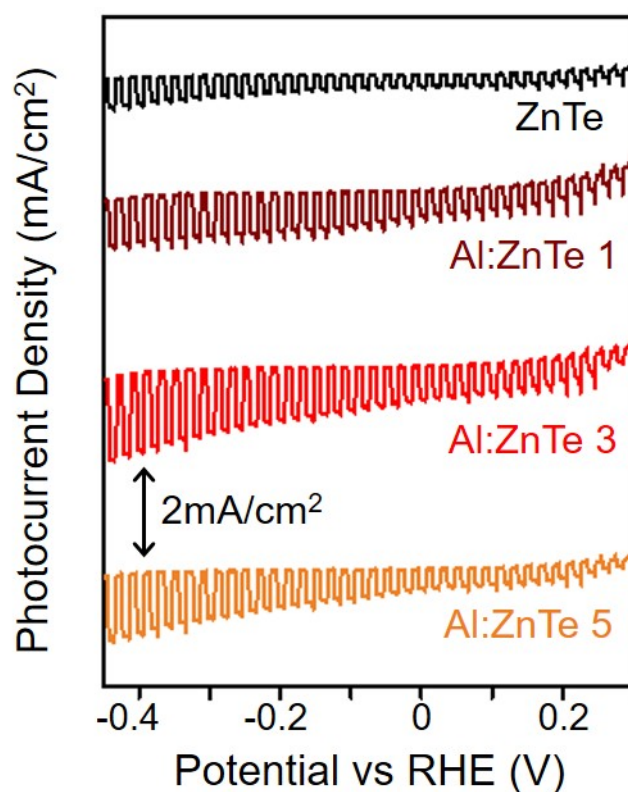

**Figure S1.** J-V curves for ZnTe and Al:ZnTe X photocathodes where X indicates molar concentration of Al dopants of 1, 3, and 5 %. All PEC measurements were performed in a  $\text{CO}_2$  saturated  $\text{KHCO}_3$  under chopped simulated solar light irradiation (AM 1.5G,  $100\text{mW}/\text{cm}^2$ ).

**Citation:** Jang, Y.J.; Lee, C.; Moon, Y.H.; Choe, S. Solar-Driven Syngas Production Using Al-Doped ZnTe Nanorod Photocathodes. *Materials* **2022**, *15*, 3102. <https://doi.org/10.3390/ma15093102>

Academic Editor: Leszek Zaraska

Received: 31 March 2022

Accepted: 21 April 2022

Published: 25 April 2022

**Publisher's Note:** MDPI stays neutral with regard to jurisdictional claims in published maps and institutional affiliations.

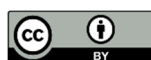

**Copyright:** © 2022 by the authors. Licensee MDPI, Basel, Switzerland. This article is an open access article distributed under the terms and conditions of the Creative Commons Attribution (CC BY) license (<https://creativecommons.org/licenses/by/4.0/>).

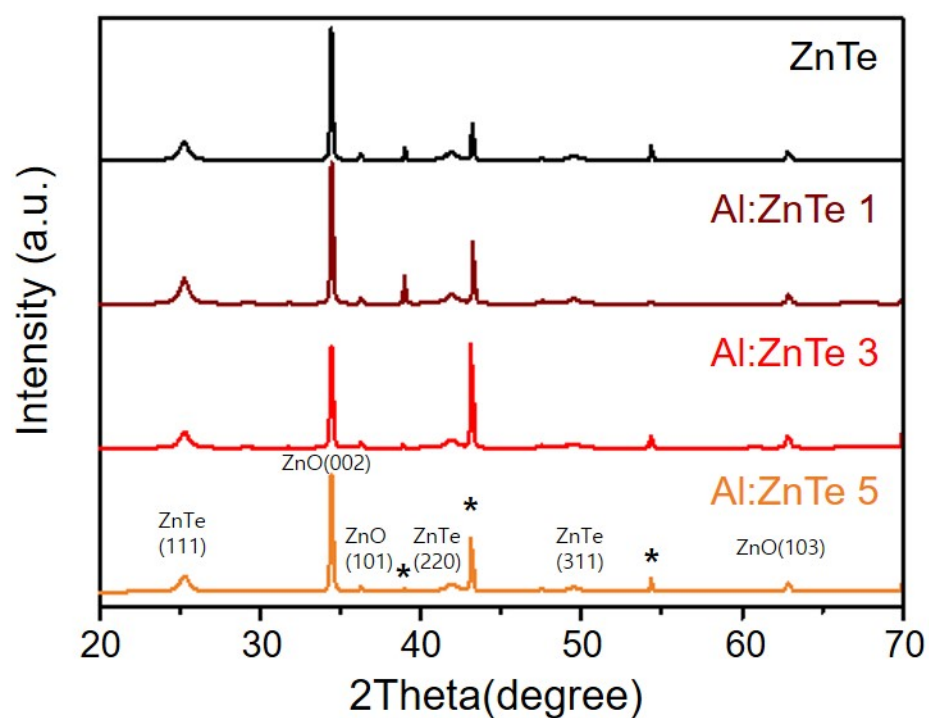

**Figure S2.** XRD patterns for ZnTe and Al:ZnTe X, where X indicates molar concentration of Al dopants of 1, 3, and 5 %. The symbol of \* indicates XRD patterns for FTO substrate

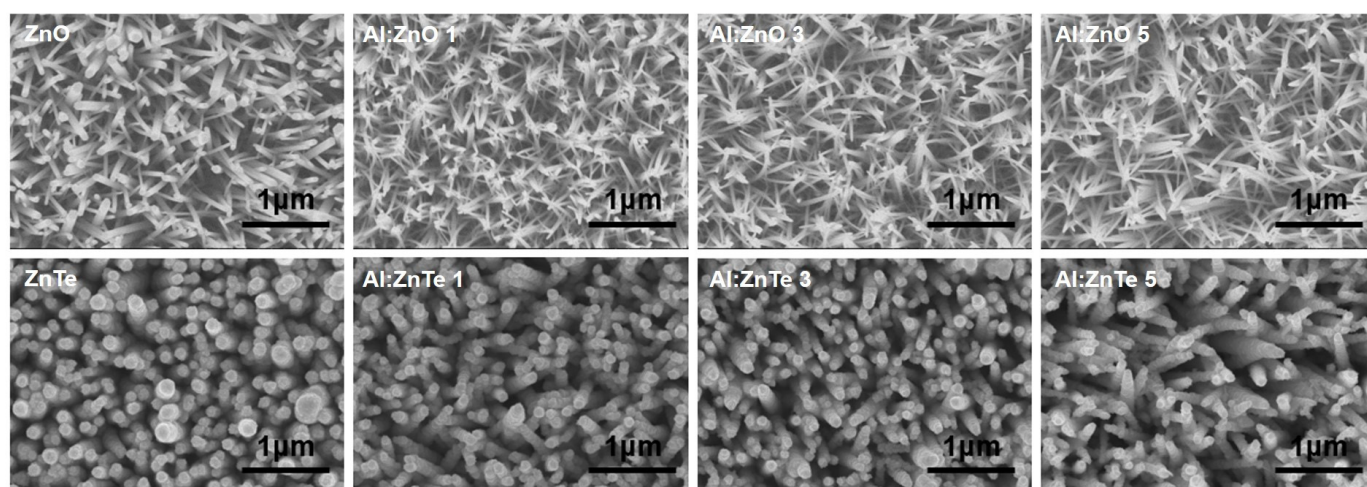

**Figure S3.** SEM images for ZnO, ZnTe, Al:ZnO X and Al:ZnTe X, where X indicates molar concentration of Al dopants of 1, 3, and 5 %.
